# Supplementary material for: A stable luminescent zinc–organic framework as a dual-sensor toward Cu2+ and Cr2O72−, and excellent platform-encapsulated Ln3+ for systematic color tuning and white-light emission
Source: Royal Society of Chemistry journal article supplement (doi:10.1039/c9nj02861g), 2019-01-01
Supplement: c9nj02861g1.pdf [file c9nj02861g1.pdf]

**A stable luminescent zinc-organic framework as dual-sensor  
towards  $\text{Cu}^{2+}$  and  $\text{Cr}_2\text{O}_7^{2-}$ , and excellent platforms encapsulated  
 $\text{Ln}^{3+}$  for systematic color tuning and white-light emission**

Bo-Wen Qin, Xiao-Ying Zhang,\* and Jing-Ping Zhang\*

*Advanced Energy Materials Research Center, Faculty of Chemistry, Northeast  
Normal University, Changchun 130024, P. R. China*

Email: zhangxy218@nenu.edu.cn; jpzhang@nenu.edu.cn.

Fax: +86-431-85684027

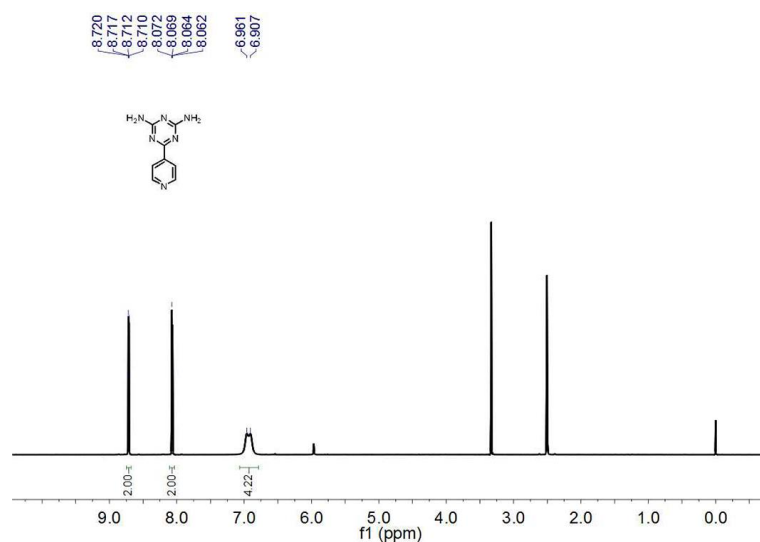

**Fig. S1** The <sup>1</sup>H NMR spectrum of PTD ligand.

**Table S1.** Crystallographic data for compound **1**.

| Compound                                    | Compound <b>1</b>                                                 |
|---------------------------------------------|-------------------------------------------------------------------|
| empirical formula                           | C <sub>36</sub> H <sub>24</sub> N <sub>6</sub> O <sub>10</sub> Zn |
| formula weight                              | 765.99                                                            |
| <i>T</i> [K]                                | 293(2)                                                            |
| crystal system                              | orthorhombic                                                      |
| space group                                 | <i>Fdd2</i>                                                       |
| <i>a</i> [Å]                                | 39.603                                                            |
| <i>b</i> [Å]                                | 43.585                                                            |
| <i>c</i> [Å]                                | 38.789                                                            |
| <i>α</i> [°]                                | 90.00                                                             |
| <i>β</i> [°]                                | 90.00                                                             |
| <i>γ</i> [°]                                | 90.00                                                             |
| <i>V</i>                                    | 66953.570                                                         |
| <i>Z</i>                                    | 16                                                                |
| $\rho_{\text{calcd}}$ [g cm <sup>-3</sup> ] | 0.990                                                             |
| $\mu$ [mm <sup>-1</sup> ]                   | 0.903                                                             |
| <i>F</i> (000)                              | 20256                                                             |

reflections collected 45496

independent reflections 29500

GOF 0.977

$R_1$ ,<sup>[a]</sup>  $I > 2\sigma(I)$  0.0648

$wR_2$ ,<sup>[b]</sup>  $I > 2\sigma(I)$  0.1865

[a]  $R_1 = \sum(|F_0| - |F_c|)/\sum|F_0|$ . [b]  $wR_2 = [\sum w(|F_0|^2 - |F_c|^2)^2/\sum w(F_0^2)^2]^{1/2}$ .

**Table S2.** Selected bond distances (Å) and bond angles (°) for complex **1**.

|                    |          |               |                       |               |          |
|--------------------|----------|---------------|-----------------------|---------------|----------|
| Zn(1)-O(16)        | 2.044(7) | Zn(2)-O(2)    | 2.040(7)              | Zn(3)-O(10)#1 | 2.109(7) |
| Zn(1)-O(1)         | 2.047(8) | Zn(2)-O(12)   | 2.052(8)              | Zn(4)-O(20)#2 | 1.997(8) |
| Zn(1)-O(11)        | 2.063(7) | Zn(2)-N(6)#1  | 2.054(7)              | Zn(4)-O(5)#3  | 2.021(8) |
| Zn(1)-O(6)         | 2.079(9) | Zn(3)-O(14)   | 2.032(7)              | Zn(4)-O(9)#1  | 2.036(8) |
| Zn(1)-N(1)         | 2.079(8) | Zn(3)-O(19)#2 | 2.033(8)              | Zn(4)-O(15)   | 2.066(8) |
| Zn(2)-O(7)         | 2.008(8) | Zn(3)-O(4)#3  | 2.049(8)              | Zn(4)-N(12)#4 | 2.091(8) |
| Zn(2)-N(17)        | 2.028(7) | Zn(3)-N(7)    | 2.074(8)              |               |          |
| O(16)-Zn(1)-O(1)   | 89.0(3)  |               | O(14)-Zn(3)-O(19)#2   | 87.6(3)       |          |
| O(16)-Zn(1)-O(11)  | 89.9(3)  |               | O(14)-Zn(3)-O(4)#3    | 158.8(3)      |          |
| O(1)-Zn(1)-O(11)   | 154.8(3) |               | O(19)#2-Zn(3)-O(4)#3  | 88.6(3)       |          |
| O(16)-Zn(1)-O(6)   | 159.3(3) |               | O(14)-Zn(3)-N(7)      | 103.3(3)      |          |
| O(1)-Zn(1)-O(6)    | 88.4(4)  |               | O(19)#2-Zn(3)-N(7)    | 102.3(3)      |          |
| O(11)-Zn(1)-O(6)   | 84.0(4)  |               | O(4)#3-Zn(3)-N(7)     | 97.8(3)       |          |
| O(16)-Zn(1)-N(1)   | 101.8(3) |               | O(14)-Zn(3)-O(10)#1   | 90.0(3)       |          |
| O(1)-Zn(1)-N(1)    | 103.1(3) |               | O(19)#2-Zn(3)-O(10)#1 | 156.4(3)      |          |
| O(11)-Zn(1)-N(1)   | 101.8(3) |               | O(4)#3-Zn(3)-O(10)#1  | 85.2(3)       |          |
| O(6)-Zn(1)-N(1)    | 98.7(4)  |               | N(7)-Zn(3)-O(10)#1    | 101.0(3)      |          |
| O(7)-Zn(2)-O(17)   | 156.2(3) |               | O(20)#2-Zn(4)-O(5)#3  | 88.8(4)       |          |
| O(7)-Zn(2)-O(2)    | 91.8(4)  |               | O(20)#2-Zn(4)-O(9)#1  | 158.9(3)      |          |
| O(17)-Zn(2)-O(2)   | 86.5(3)  |               | O(5)#3-Zn(4)-O(9)#1   | 88.6(4)       |          |
| O(7)-Zn(2)-O(12)   | 85.5(4)  |               | O(20)#2-Zn(4)-O(15)   | 87.2(4)       |          |
| O(17)-Zn(2)-O(12)  | 88.8(4)  |               | O(5)#3-Zn(4)-O(15)    | 157.1(3)      |          |
| O(2)-Zn(2)-O(12)   | 161.8(3) |               | O(9)#1-Zn(4)-O(15)    | 87.0(4)       |          |
| O(7)-Zn(2)-N(6)#1  | 107.2(3) |               | O(20)#2-Zn(4)-N(12)#4 | 97.6(3)       |          |
| O(17)-Zn(2)-N(6)#1 | 96.5(3)  |               | O(5)#3-Zn(4)-N(12)#4  | 103.8(4)      |          |
| O(2)-Zn(2)-N(6)#1  | 99.1(3)  |               | O(9)#1-Zn(4)-N(12)#4  | 103.4(4)      |          |
| O(12)-Zn(2)-N(6)#1 | 98.9(3)  |               | O(15)-Zn(4)-N(12)#4   | 99.1(3)       |          |

Symmetry codes: #1: x+1/4, -y+3/4, z-1/4; #2: x+1/2, y+1/2, z; #3: x+1/4, -y+1/4, z+1/4; #4: x-1/4, -y+1/4, z-1/4

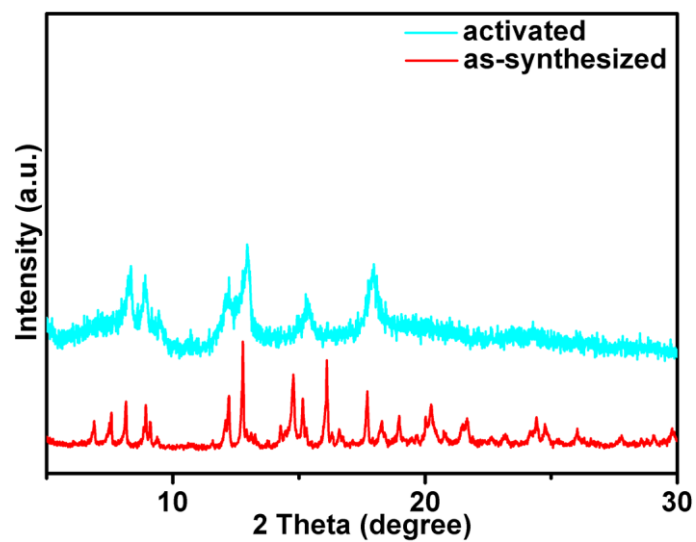

**Fig. S2** The PXRD spectra of compound **1** after activated and freshly prepared.

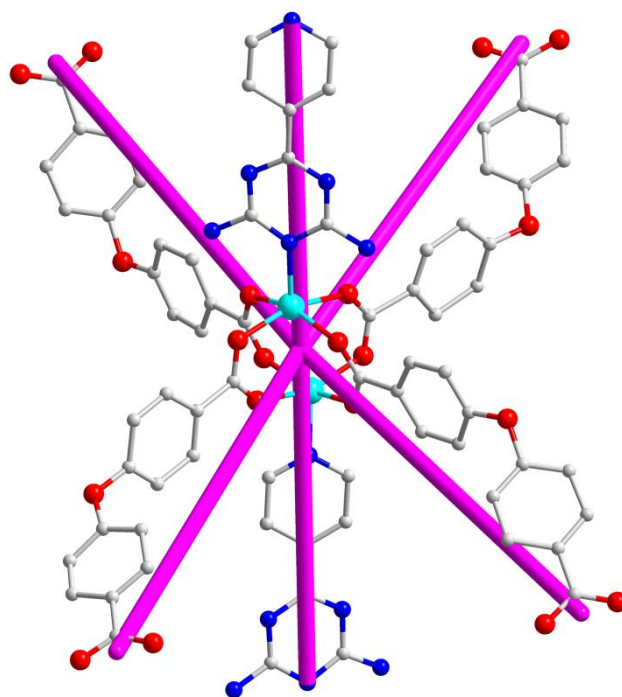

**Fig. S3** The  $\text{Zn}_2\text{O}_8\text{N}_2$  paddle-wheel SBU and its topological structure.

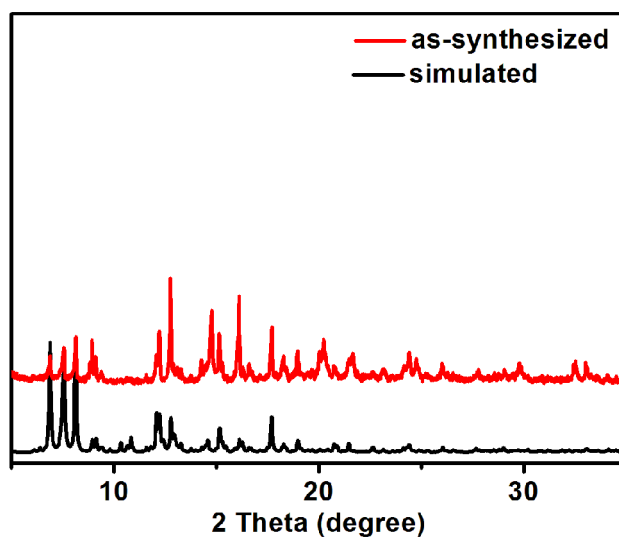

Fig. S4 PXRD spectra of complex 1.

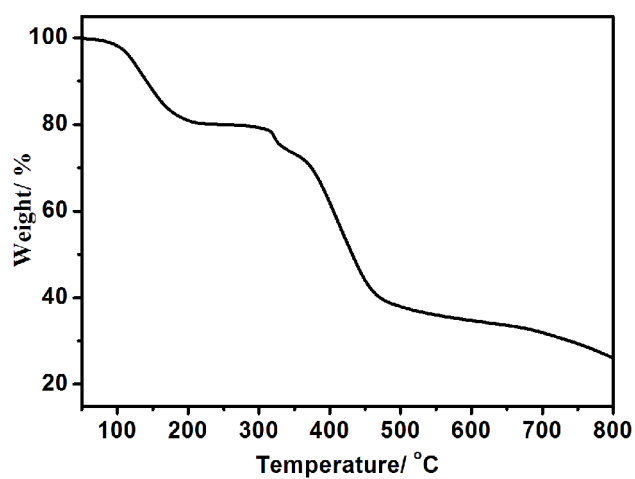

Fig. S5 TGA curve of complex 1.

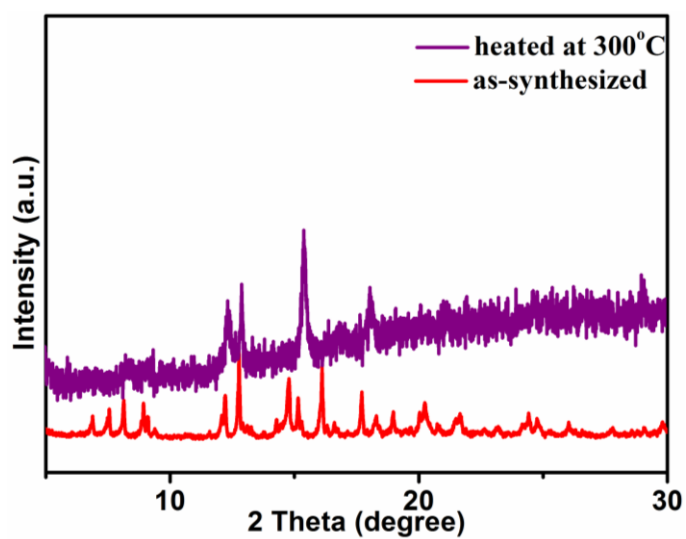

Fig. S6 PXRD spectra of complex 1 after heated for 4 hours at 300°C.

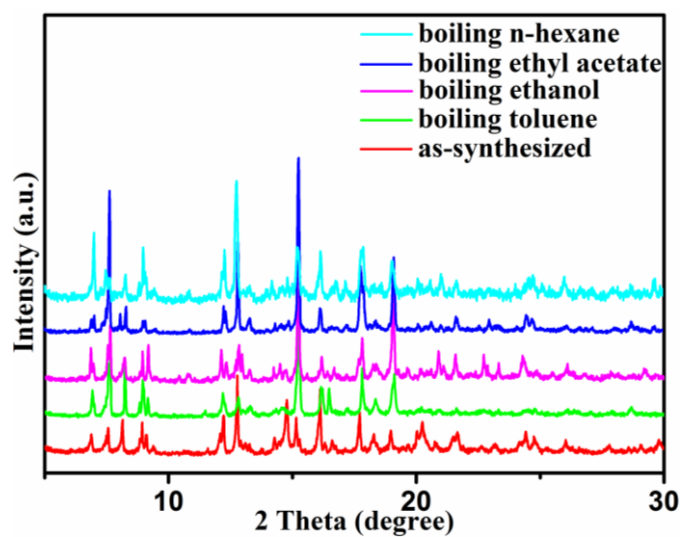

**Fig. S7** PXRD spectra of compound **1** after being soaked in various boiling solvents for 36 hours.

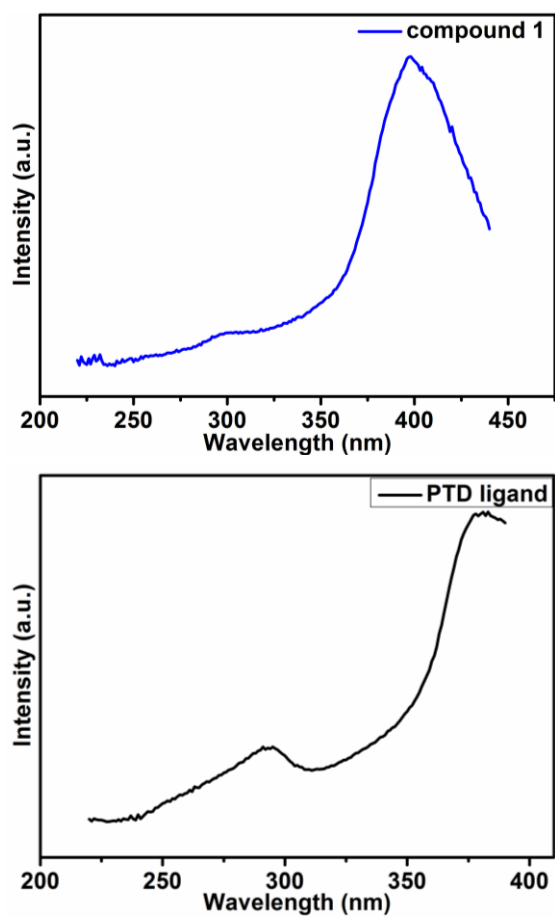

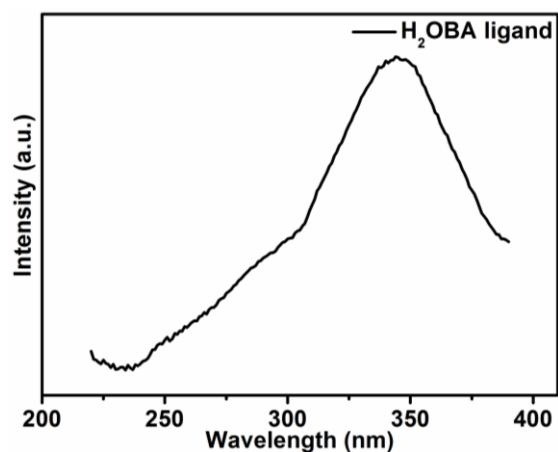

**Fig. S8** Solid-state excitation spectra of compound **1**, PTD ligand, and H<sub>2</sub>OBA ligand at room temperature.

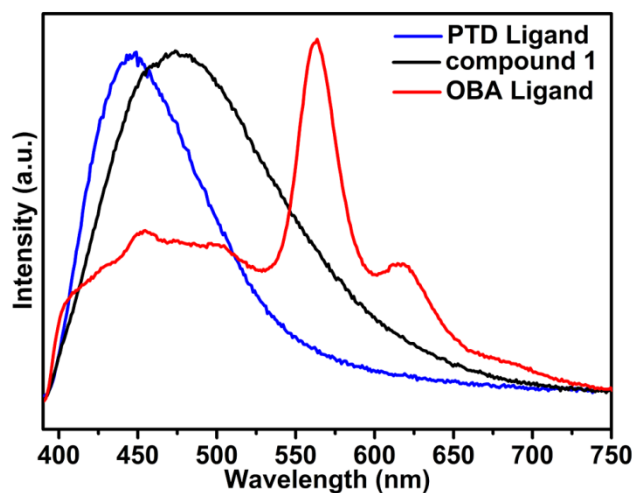

**Fig. S9** Solid-state emission spectra of PTD ligand (excited at 375 nm), compound **1** (excited at 380 nm) and OBA ligand (excited at 346 nm) at room temperature.

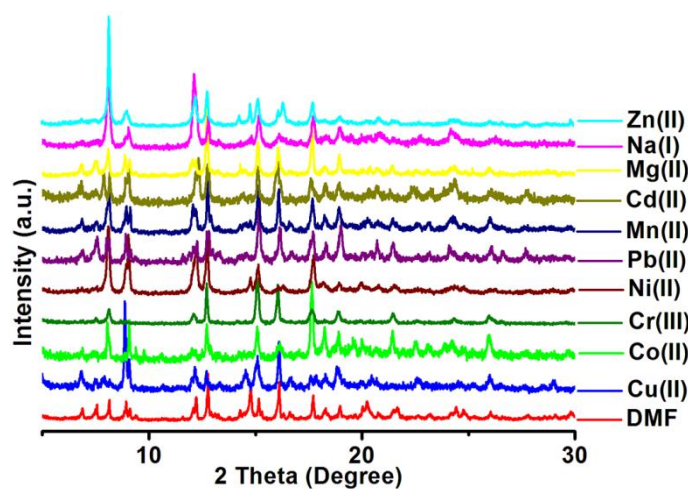

**Fig. S10** PXRD patterns of as-synthesized compound **1** and metal ions-incorporated samples.

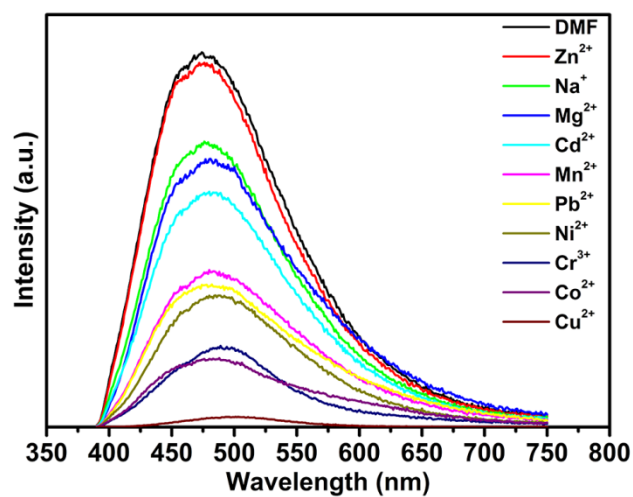

**Fig. S11** Luminescence spectra of solid compound **1** treated with 10 mM various cations in DMF solutions for 24 hours.

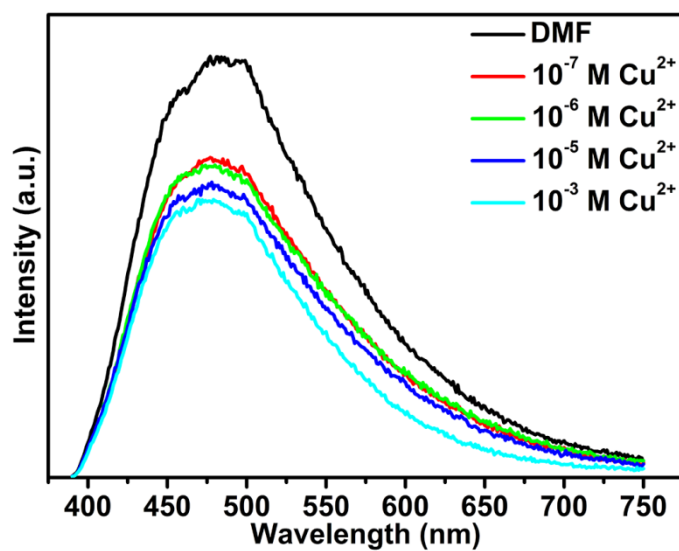

**Fig. S12** Luminescence spectra of solid compound **1** treated with  $\text{Cu}^{2+}$  ions at various concentrations in 10 mL DMF solutions for 24 hours.

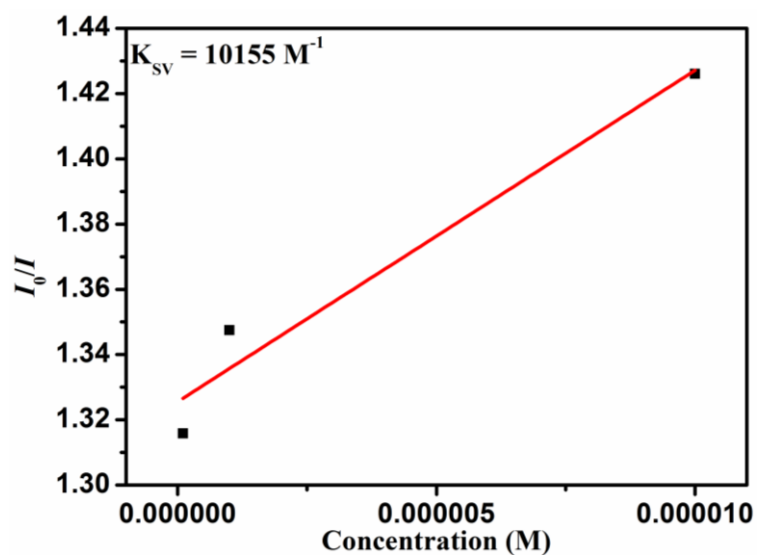

**Fig. S13** Stern-Volmer plot of  $I_0/I$  vs. the concentration of  $\text{Cu}^{2+}$  ions in DMF.

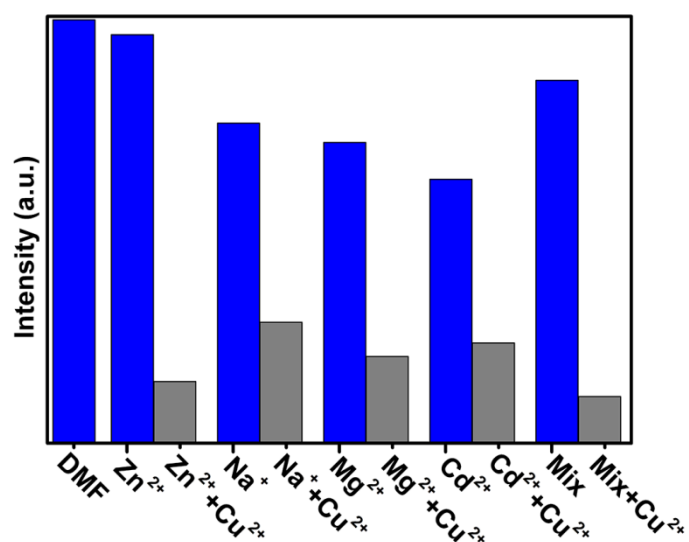

**Fig. S14** The comparisons of luminescent intensities of compound **1** treated with 10 mM various cations in 10 mL DMF solutions for 24 hours. Mix: mixture of  $\text{Zn}^{2+}$ ,  $\text{Na}^+$ ,  $\text{Mg}^{2+}$  and  $\text{Cd}^{2+}$ .

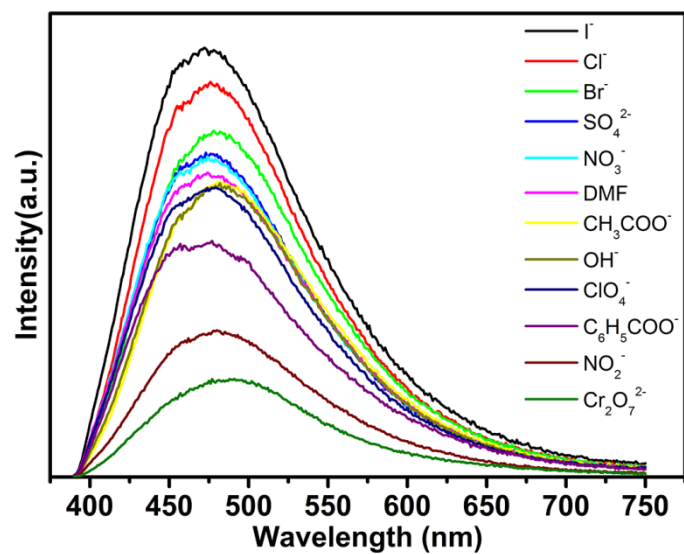

**Fig. S15** Luminescence spectra of solid compound **1** treated with 10 mM various anions in DMF solutions for 24 hours.

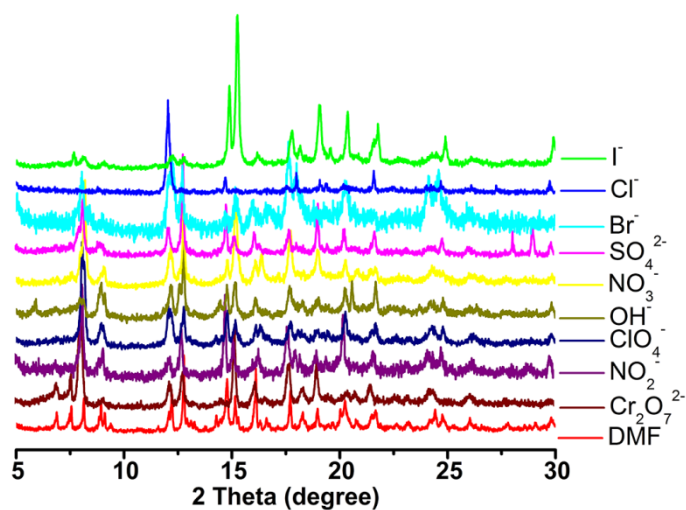

**Fig. S16** PXRD patterns of as-synthesized compound **1** (DMF) and some anions-incorporated samples.

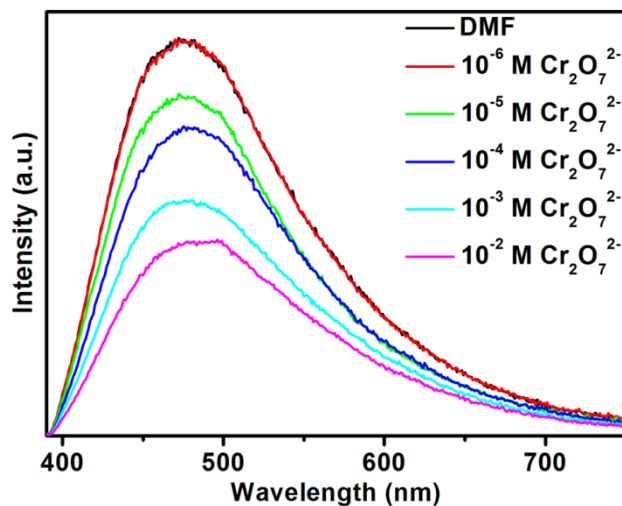

**Fig. S17** Luminescence spectra of solid compound **1** treated with  $\text{Cr}_2\text{O}_7^{2-}$  ions at various concentrations in 10 mL DMF solutions for 24 hours.

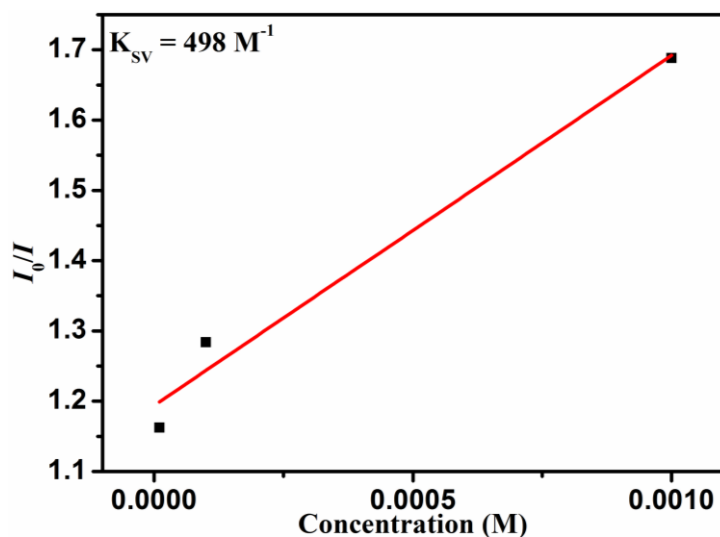

**Fig. S18** Stern-Volmer plot of  $I_0/I$  vs. the concentration of  $\text{Cr}_2\text{O}_7^{2-}$  ions in DMF.

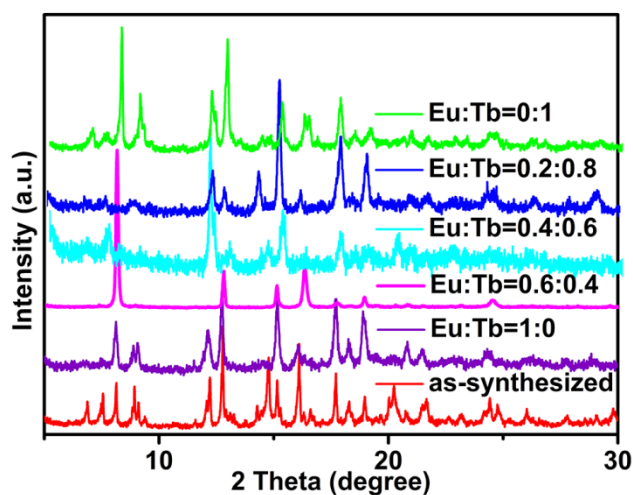

**Fig. S19** PXRD patterns of as-synthesized compound **1** and some lanthanide-doped

samples.

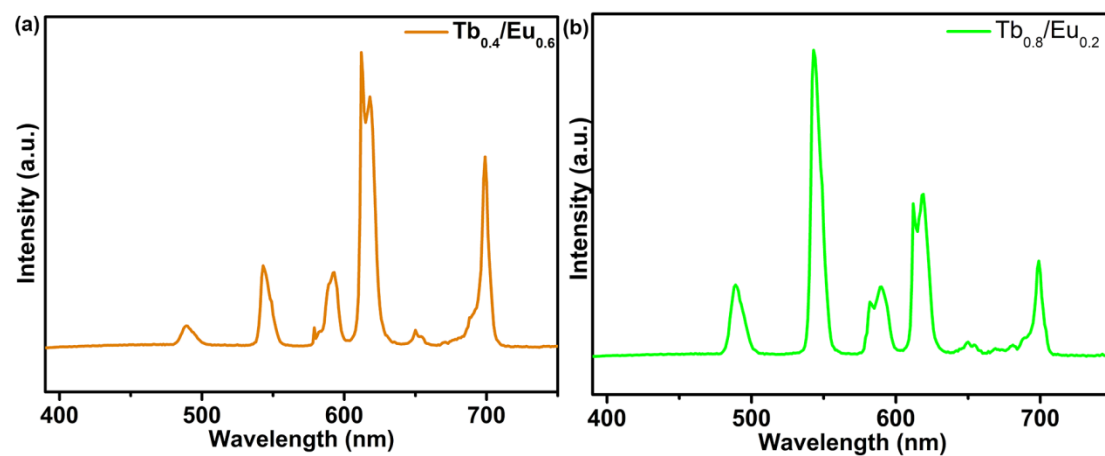

**Fig. S20** The emission spectra ( $\lambda = 283$  nm) of  $\text{Tb}_{0.4}/\text{Eu}_{0.6}$  (a) and  $\text{Tb}_{0.8}/\text{Eu}_{0.2}$  (b) doped compound **1**.

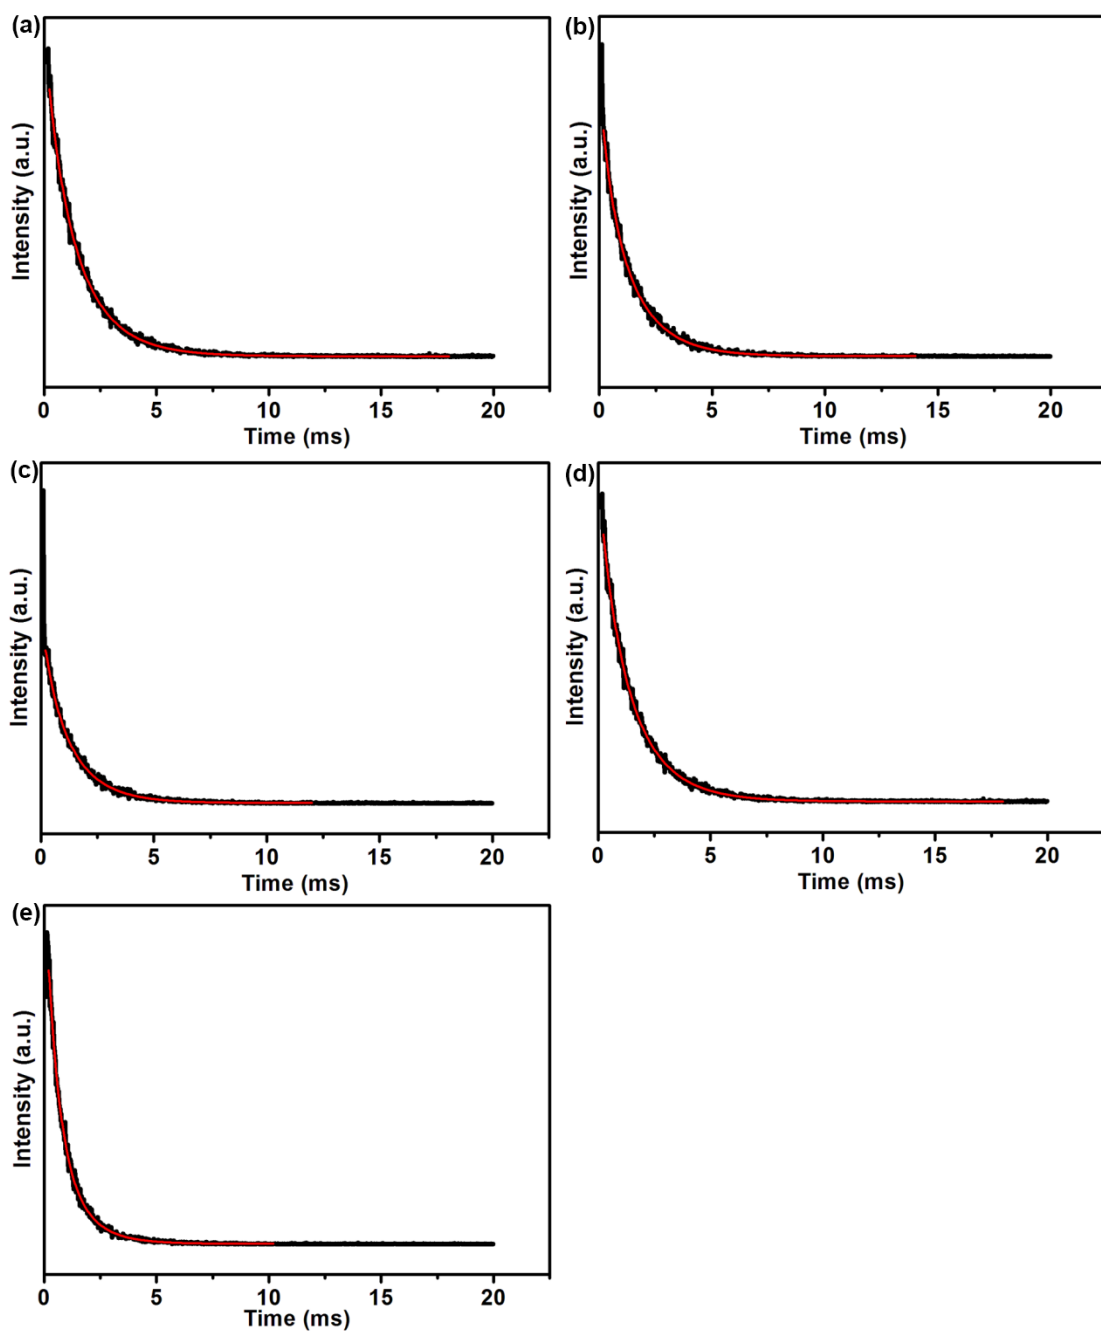

**Fig. S21** Luminescence decay curves. (a)  $\tau_1 = 813.8381$  and  $\tau_2 = 1673.1261$   $\mu\text{s}$  for  $\text{Tb}_1/\text{Eu}_0$ . (b)  $\tau_1 = 532.2680$  and  $\tau_2 = 1500.8012$   $\mu\text{s}$  for  $\text{Tb}_{0.8}/\text{Eu}_{0.2}$ . (c)  $\tau_1 = 612.6855$  and  $\tau_2 = 1428.0812$   $\mu\text{s}$  for  $\text{Tb}_{0.6}/\text{Eu}_{0.4}$ . (d)  $\tau_1 = 488.5423$  and  $\tau_2 = 1372.6250$   $\mu\text{s}$  for  $\text{Tb}_{0.4}/\text{Eu}_{0.6}$ . (e)  $\tau_1 = 530.6851$  and  $\tau_2 = 1221.9450$   $\mu\text{s}$  for  $\text{Tb}_0/\text{Eu}_1$ .

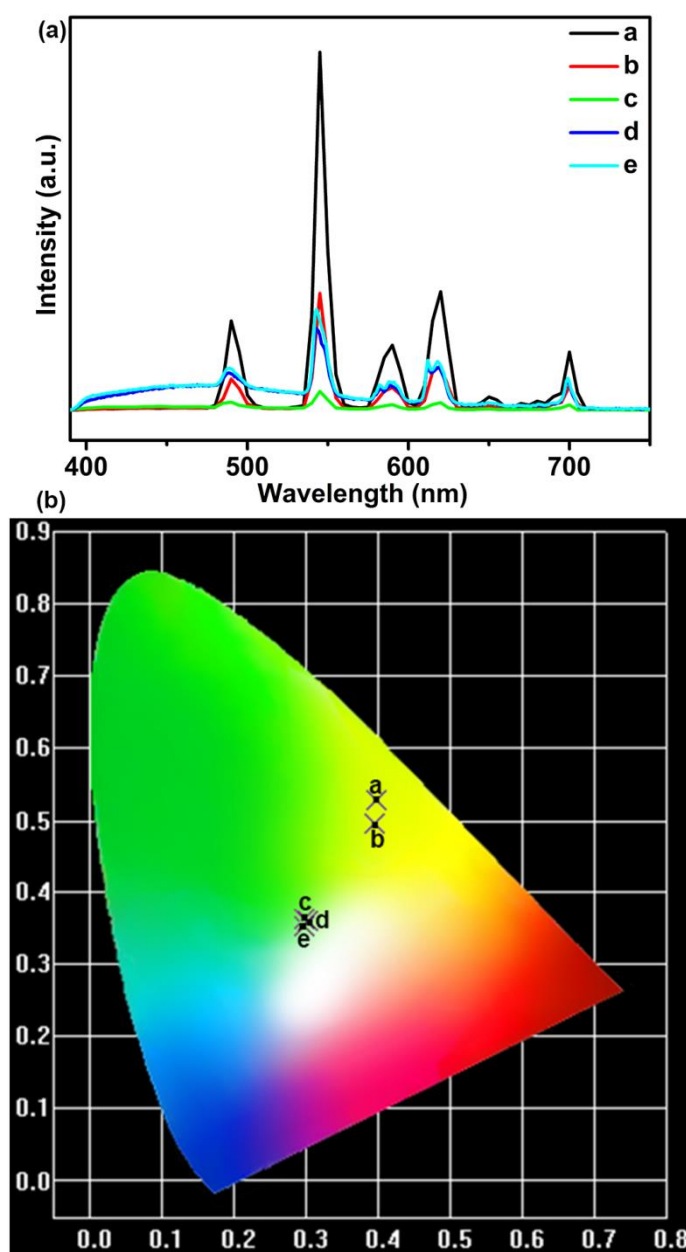

**Fig. S22** The Emission spectra (a) and CIE chromaticity diagram (b) of compound **1** incorporated by lanthanide ions upon excitation at 283 nm. The samples were prepared by doping 50 mg as-synthesized compound **1** with different molar mass Ln<sup>3+</sup> (Eu<sup>3+</sup>/Tb<sup>3+</sup>) in 10 mL DMF. a:  $5 \times 10^{-1}$  mmol with Eu<sup>3+</sup>/Tb<sup>3+</sup> (1/4); b:  $5 \times 10^{-2}$  mmol with Eu<sup>3+</sup>/Tb<sup>3+</sup> (1/4); c:  $5 \times 10^{-5}$  mmol with Eu<sup>3+</sup>/Tb<sup>3+</sup> (1/4); d:  $5 \times 10^{-5}$  mmol with Eu<sup>3+</sup>/Tb<sup>3+</sup> (1/3); e:  $5 \times 10^{-5}$  mmol with Eu<sup>3+</sup>/Tb<sup>3+</sup> (3/7).

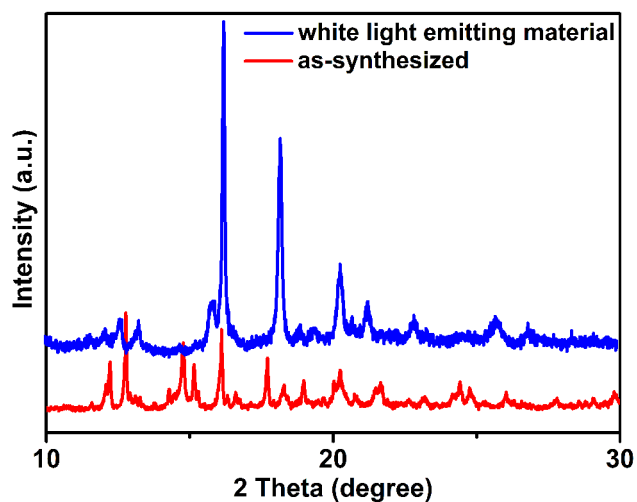

**Fig. S23** The PXRD patterns of as-synthesized compound **1** and white-light emission compound **1** with  $\text{Ln}^{3+}$ -doped.

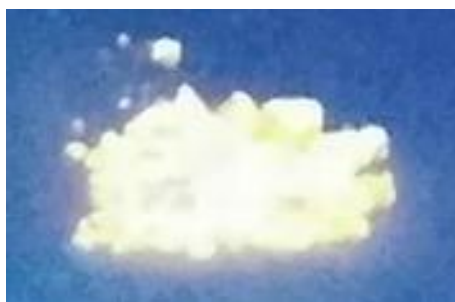

**Fig. S24** The photograph of  $\text{Ln}^{3+}$ -doped compound **1** with white-light emission.

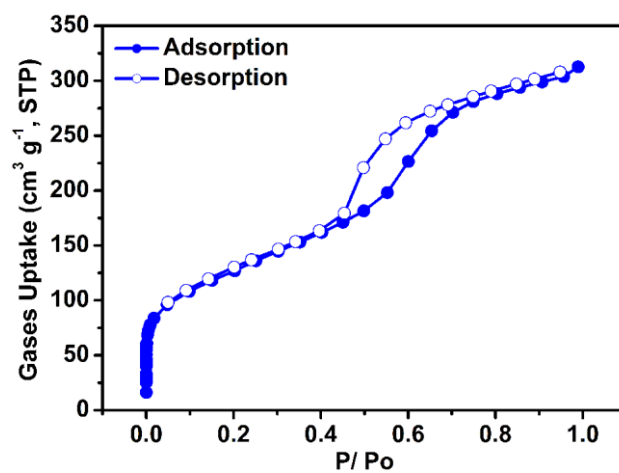

**Fig. S25** The  $\text{N}_2$  sorption isotherms for compound **1**, outgas temperature is 180°C under vacuum.

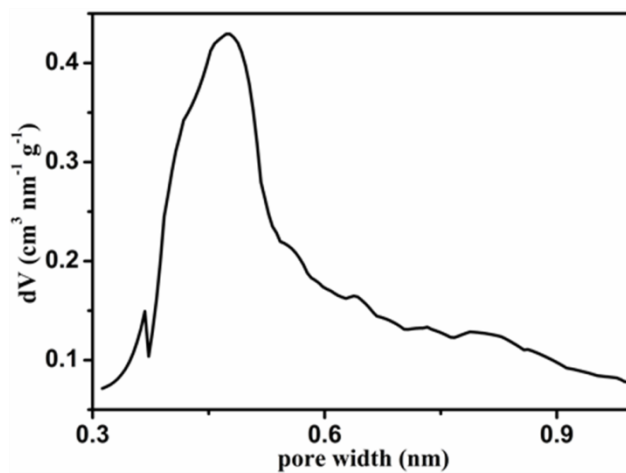

**Fig. S26** The pore size distributions of compound **1**.

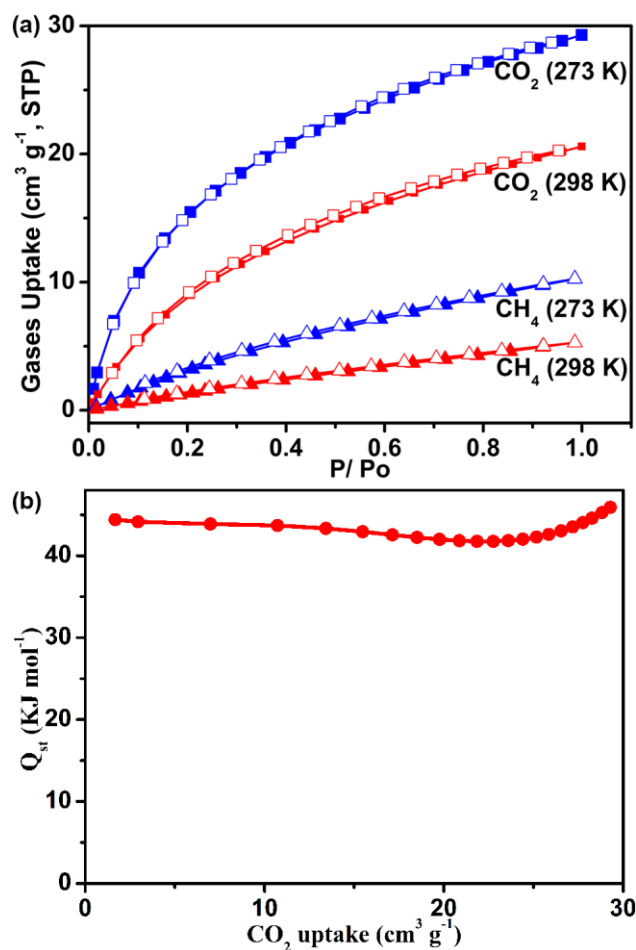

**Fig. S27** (a) Gas adsorption isotherms of  $\text{CO}_2$  and  $\text{CH}_4$  for compound **1** at 273 K and 298 K; (b) Isosteric heat of  $\text{CO}_2$  adsorption for compound **1** estimated by the virial equation from the adsorption isotherms at 273 K and 298 K.

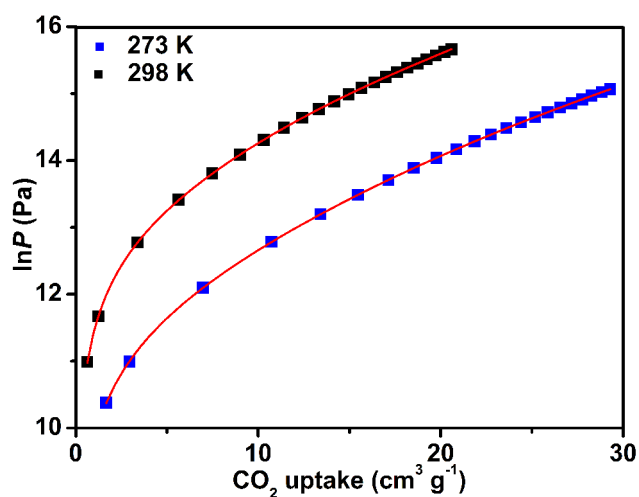

**Fig. S28** Virial analysis of the CO<sub>2</sub> adsorption data at 273 and 298 K for compound **1**. Fitting results:  $a_0 = -9.4742$ ,  $a_1 = 0.02258$ ,  $a_2 = 0.00252$ ,  $a_3 = -0.00008$ ,  $a_4 = 7.4482\text{E-}7$ ,  $\text{Chi}^2 = 0.00003$ ,  $R^2 = 0.99998$ .
